# Supplementary material
Source: PubMed Central journal article supplement (PMC2200810)

**A.**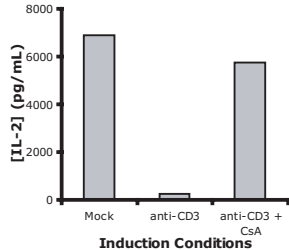**B.**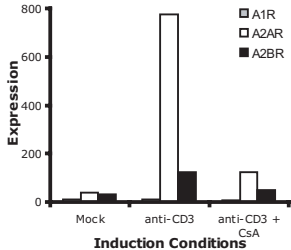

Supplement: blood_blood-2007-03-081646_1.pdf [file blood_blood-2007-03-081646_1.pdf]

**Vehicle**

**CGS**

**Day 2**

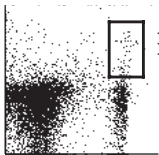

**0.9%**

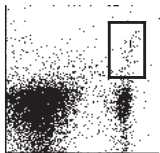

**0.9%**

**Day 3**

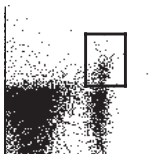

**2.8%**

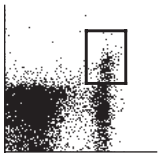

**2.5%**

**6.5**

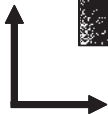

**CD4**

Supplement: blood_blood-2007-03-081646_2.pdf [file blood_blood-2007-03-081646_2.pdf]
